# Supplementary material for: Enhanced production of aromatics from syngas over CoMnAl oxides combined with b-axis thickness tailored HZSM-5
Source: Royal Society of Chemistry journal article supplement (doi:10.1039/d4qm00059e), 2024-01-01
Supplement: d4qm00059e1.pdf [file d4qm00059e1.pdf]

## Supplementary Information for

### **Enhanced production of aromatics from syngas over CoMnAl oxides combined with *b*-axis thickness tailored HZSM-5**

Ruixin Guo<sup>1,2,†</sup>, Jia Liu<sup>1,2,†</sup>, Hao Wang<sup>1,2\*</sup>, Xing Yu<sup>1</sup>, Jian Zhang<sup>1</sup>, Chengguang Yang<sup>1,2\*</sup>, Jiong Li<sup>3</sup>,  
Yuhan Sun<sup>4</sup>, Peng Gao<sup>1,2\*</sup>

<sup>1</sup> CAS Key Laboratory of Low-Carbon Conversion Science and Engineering, Shanghai Advanced Research Institute, Chinese Academy of Sciences, Shanghai 201210, China

<sup>2</sup> University of Chinese Academy of Sciences, Beijing 100049, China

<sup>3</sup> Shanghai Synchrotron Radiation Facility, Shanghai Advanced Research Institute, Chinese Academy of Sciences, Shanghai 201204, China

<sup>4</sup> School of Physical Science and Technology, ShanghaiTech University, Shanghai 201210, China

† These authors contributed equally: Ruixin Guo, Jia Liu.

\* Corresponding author. Email: haowang@sari.ac.cn, yangcg@sari.ac.cn, gaopeng@sari.ac.cn.

## S1. Methods

### S1.1 Catalyst characterizations

X-ray diffraction (XRD) analyzer (Rigaku Ultima IV) was used to record the XRD patterns of the samples. The ratio of Si/Al was determined by X-ray fluorescence (XRF) using a Rigaku ZSX Primus II instrument.

Emission scanning electron microscopy (SEM) (ZEISS SUPRRATM55 SAPPHIRE) and transmission electron microscopy (TEM) (JEOL-JEM 2000FX) were used for morphological observation. The samples were dispersed in ethanol following ultra-sonication and then dropped on a carbon-coated copper grid for measurement.

N<sub>2</sub> pysisorption was carried out on the Micromeritics ASAP 3020 instrument. The sample was firstly degassed at 200 °C in a vacuum for 12 h and then moved to the analysis station for adsorption-desorption at -196 °C. The specific surface area was determined based on the Brunauer-Emmett-Teller (BET) method and the pore volume and pore diameter were calculated based on the Barrett-Joyner-Halenda (BJH) model.

X-ray photoelectron spectroscopy (XPS) was collected on a Thermo Scientific K-Alpha with Al K $\alpha$  at 150 W ( $h\nu = 1486.6$  eV) under  $5 \times 10^{-7}$  Pa, calibrated internally by the carbon deposit C1s ( $E_b = 284.8$  eV).

<sup>27</sup>Al MAS NMR experiments were tested on Bruker AVANCE III 600 spectrometers at 156.4 MHz with a MAS probe at a spinning rate of 14 kHz. 1.0 M Al(NO<sub>3</sub>)<sub>3</sub> solution was referenced to the chemical shift of <sup>27</sup>Al.

NH<sub>3</sub> temperature-programmed desorption (NH<sub>3</sub>-TPD) experiments were recorded with a thermal conductivity detector (TCD). Typically, 100 mg sample was pretreated in an Ar flow (30 mL·min<sup>-1</sup>)

at 200 °C for 1 h. After cooling to 50 °C, the sample was saturated with ammonia flow for 0.5 h, and then the Ar flow was introduced as the sweep gas. Finally, NH<sub>3</sub>-TPD was presented in the temperature range from 50 to 600 °C at a rate of 10 °C.

X-ray adsorption near-edge spectroscopy (XANES) experiments were performed at BL11B in Shanghai synchrotron Radiation Facility (SSRF) in transmission mode. The XANES spectra of the samples were recorded at the Co K-edge (7712 eV) under ambient conditions.

## **S1.2 Catalytic performance measurements**

Syngas conversion was carried out on a continuous flow fixed-bed reactor under mild reaction conditions (280 °C, 2.0 MPa, 2000 mL·h<sup>-1</sup>·g<sup>-1</sup> and H<sub>2</sub>/CO ratio = 1). The calcined CMA and the ZSM-5 zeolites were ground and sieved through a 40–60 mesh. By granule mixing of 0.33 g CMA and 0.67 g ZSM-5, 1.0 g catalyst was loaded into the middle of a stainless steel autoclave. Before the reaction, the catalysts were in situ reduced at 300 °C for 8 h under 10% H<sub>2</sub>/Ar flow (200 mL·min<sup>-1</sup>) at 0.1 MPa. Then, the reactor was cooled to the desired temperature under the reduction atmosphere and the feed gas was introduced into the reactor. After passing through a hot trap (120 °C) and a cold trap (0 °C), the tail gas products were analyzed online using a Shimadzu GC-2010. H<sub>2</sub>, N<sub>2</sub>, CO, CH<sub>4</sub>, and CO<sub>2</sub> were detected using a thermal conductivity detector equipped with a TDX-01 column. A flame ionization detector equipped with a KCl-modified alumina capillary column was used to analyze the C1–C6 hydrocarbons. The collected liquid products were analyzed on two Shimadzu GC-2010 systems equipped with an HP-5 and an HP-innowax capillary column, respectively. CO conversion was calculated by the internal standard method using N<sub>2</sub> from the feed gas. Calculations of CO<sub>2</sub> selectivity and hydrocarbon product distribution were based on a molar carbon basis and the carbon balance was kept among 97–100%.

## S2. Results and discussions

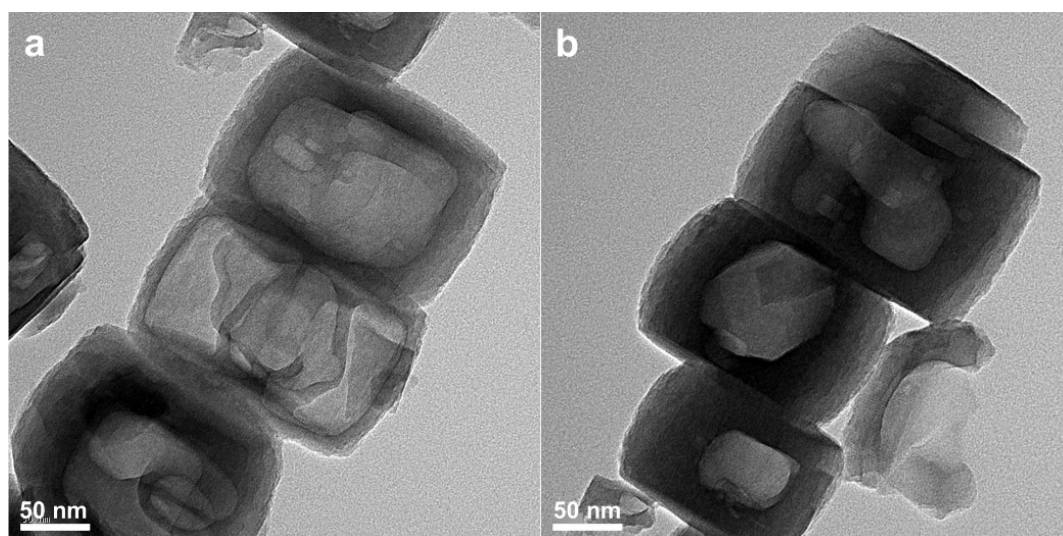

**Fig. S1** TEM images of the Hol-HZ5 (a and b).

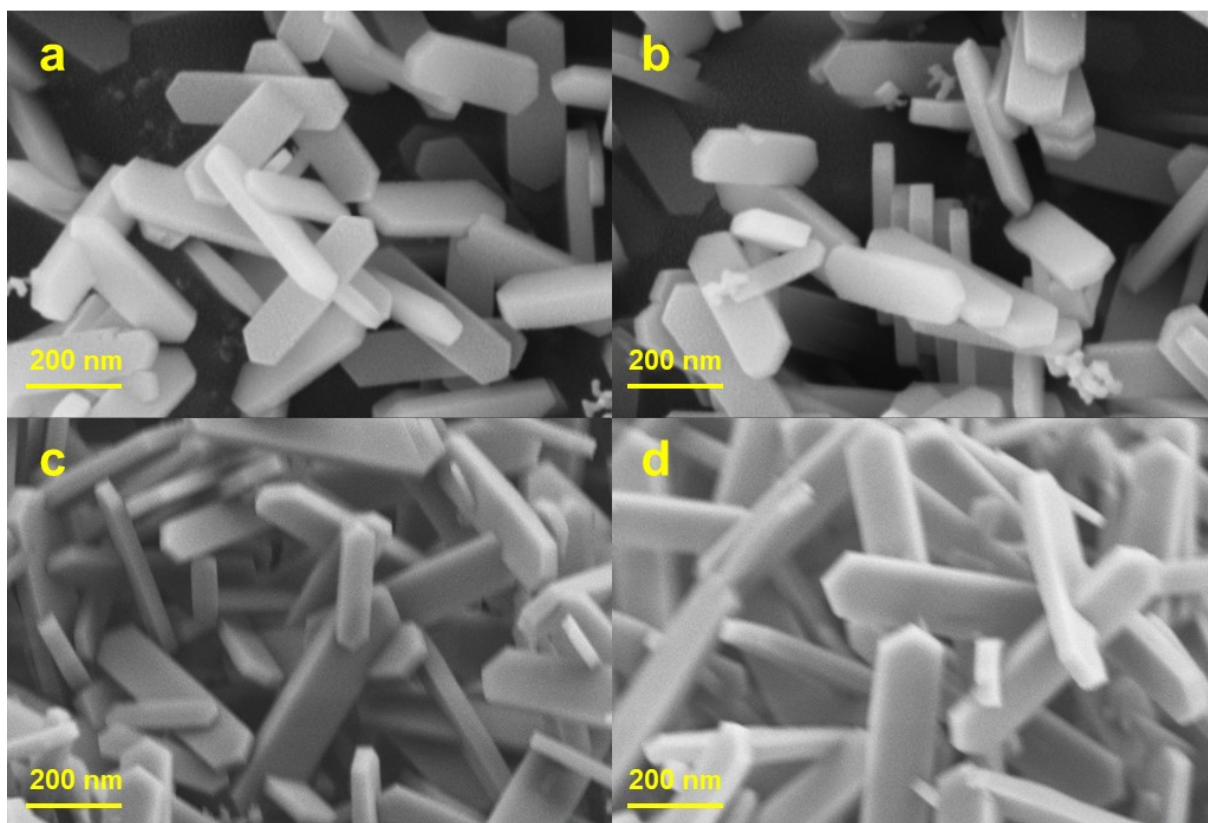

**Fig. S2** SEM images of the Sbx-HZ5-65 (a), Sbx-HZ5-82 (b), Sbx-HZ5-123 (c), and Sbx-HZ5-252 (d).

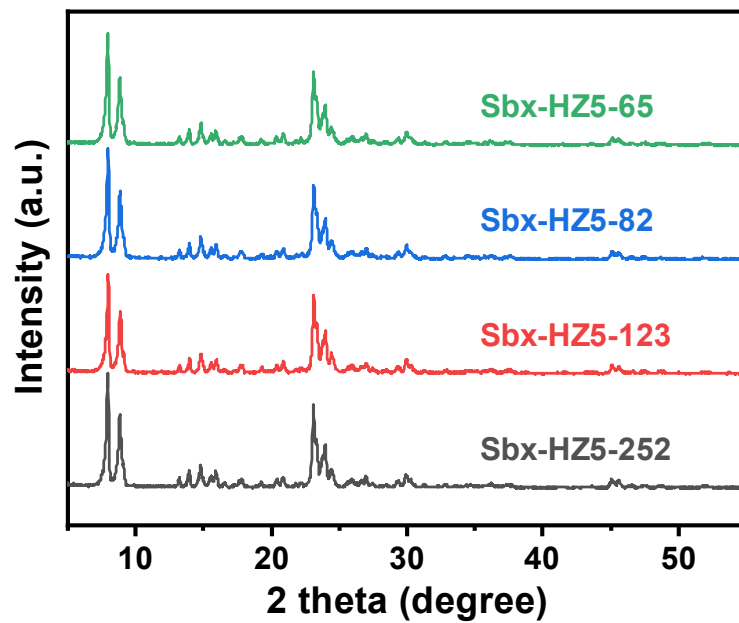

**Fig. S3** XRD patterns of Sbx-HZ5 with different Si/Al molar ratio.

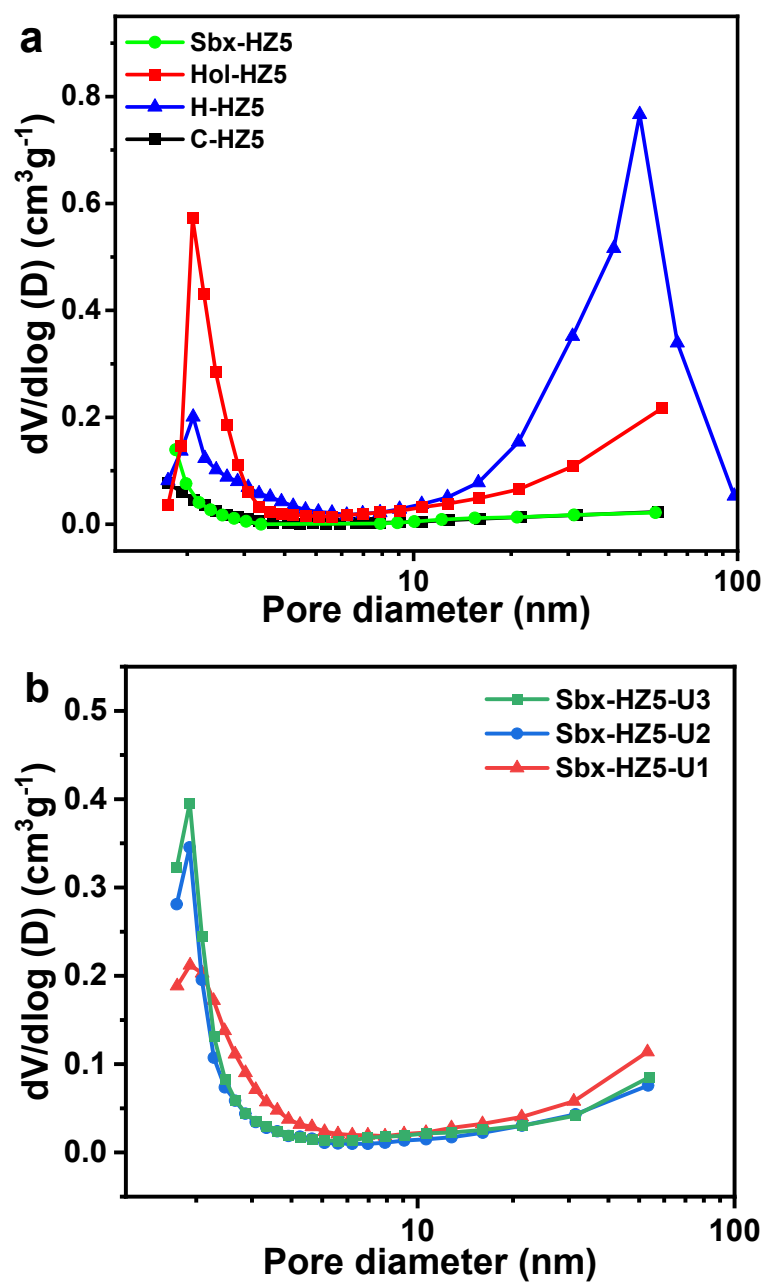

**Fig. S4** The pore size distribution curves of different types of zeolites (a) and Sbx-HZ5-Uy (b).

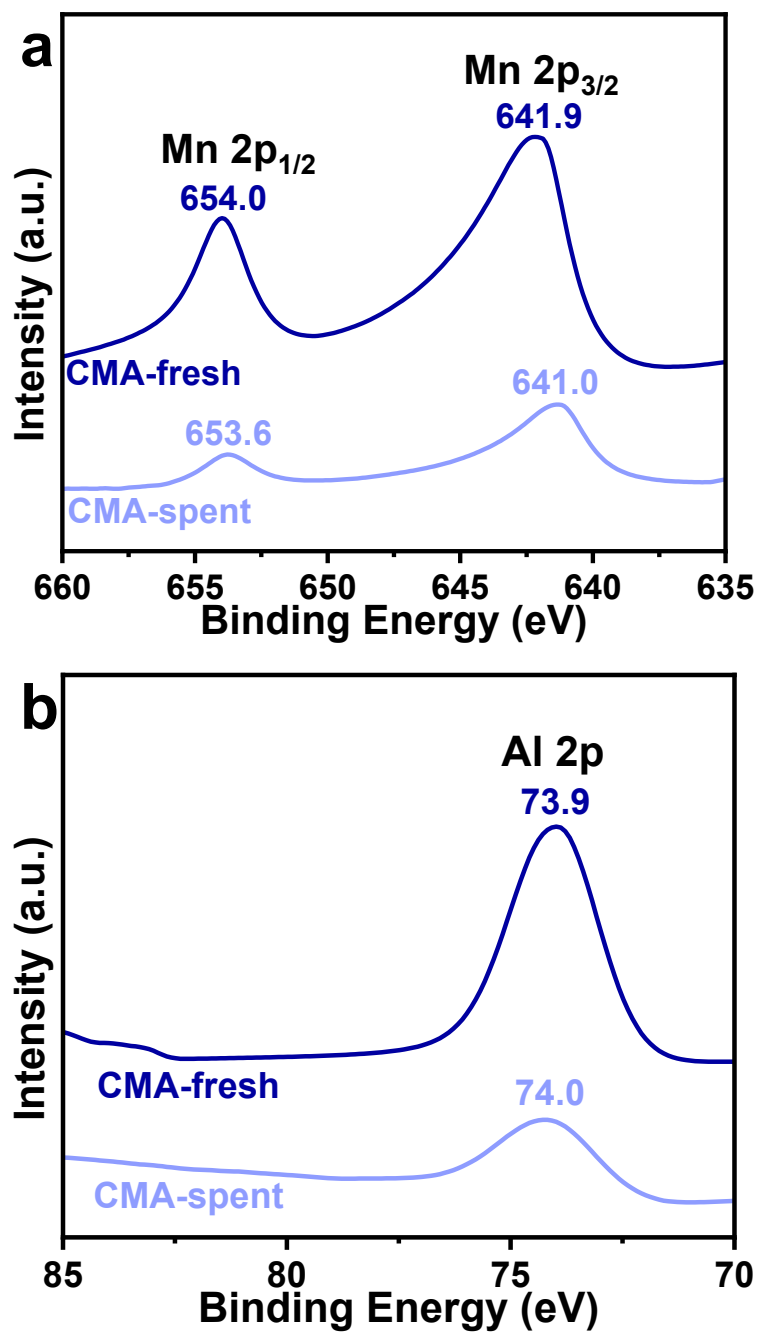

Fig. S5 Mn 2p (a) and Al 2p (b) for XPS of fresh and spent CMA catalysts.



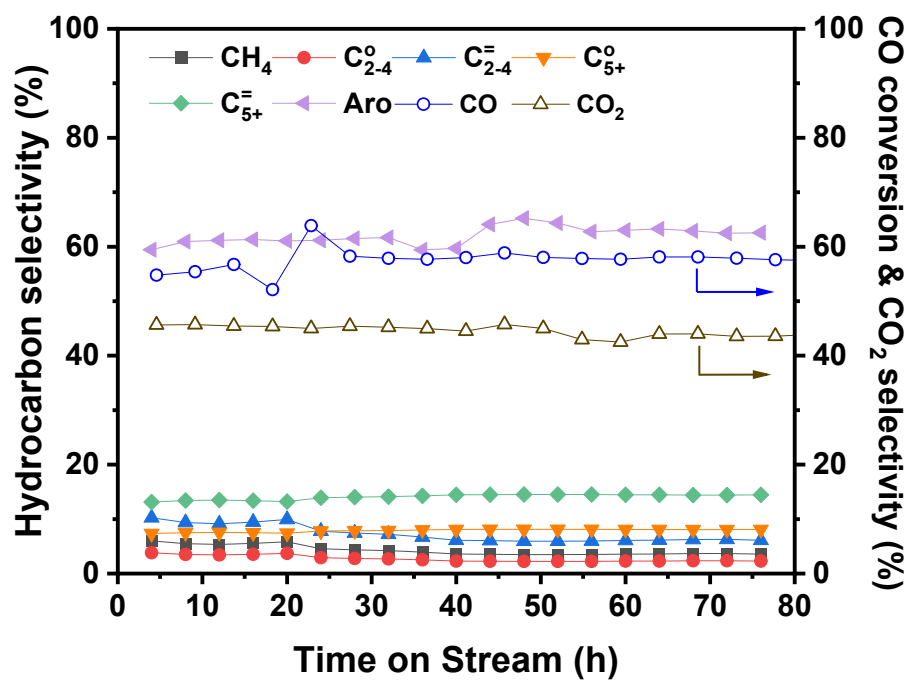

Fig. S6 Stability test of the CMA/Sbx-HZ5-123 under the standard reaction conditions.

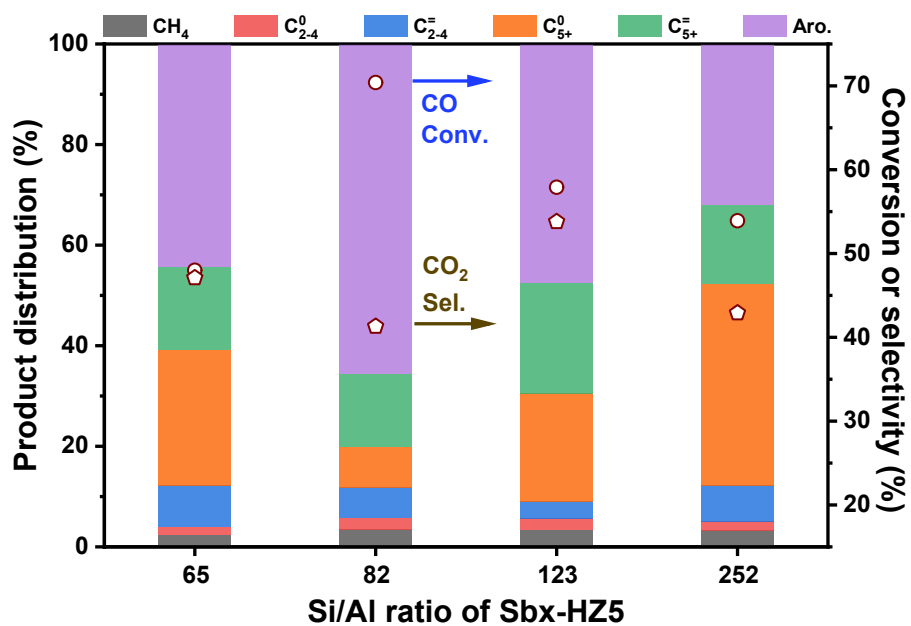

**Fig. S7** The effect of Si/Al ratio of Sbx-HZ5 on the catalytic performance over bifunctional catalysts under the standard conditions.

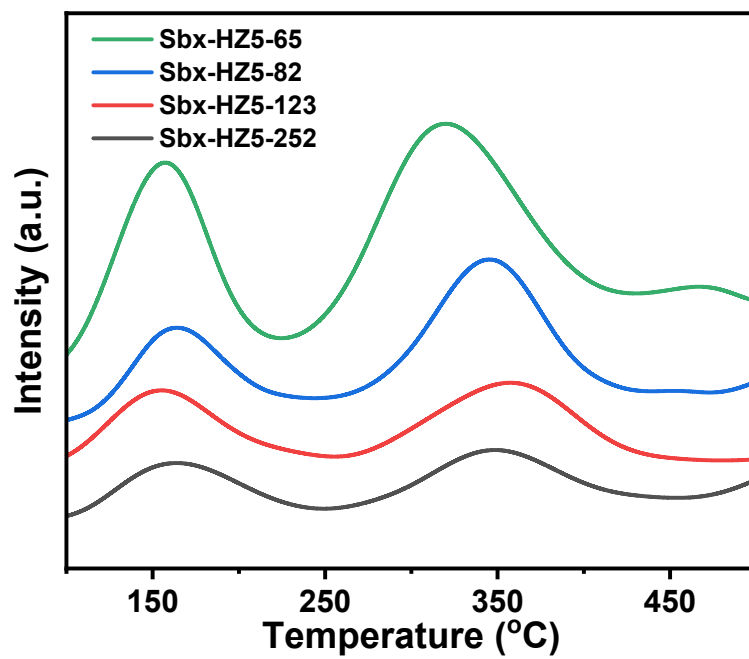

**Fig. S8** NH<sub>3</sub>-TPD profiles of the Sb<sub>x</sub>-HZ5 zeolites with different Si/Al ratio.

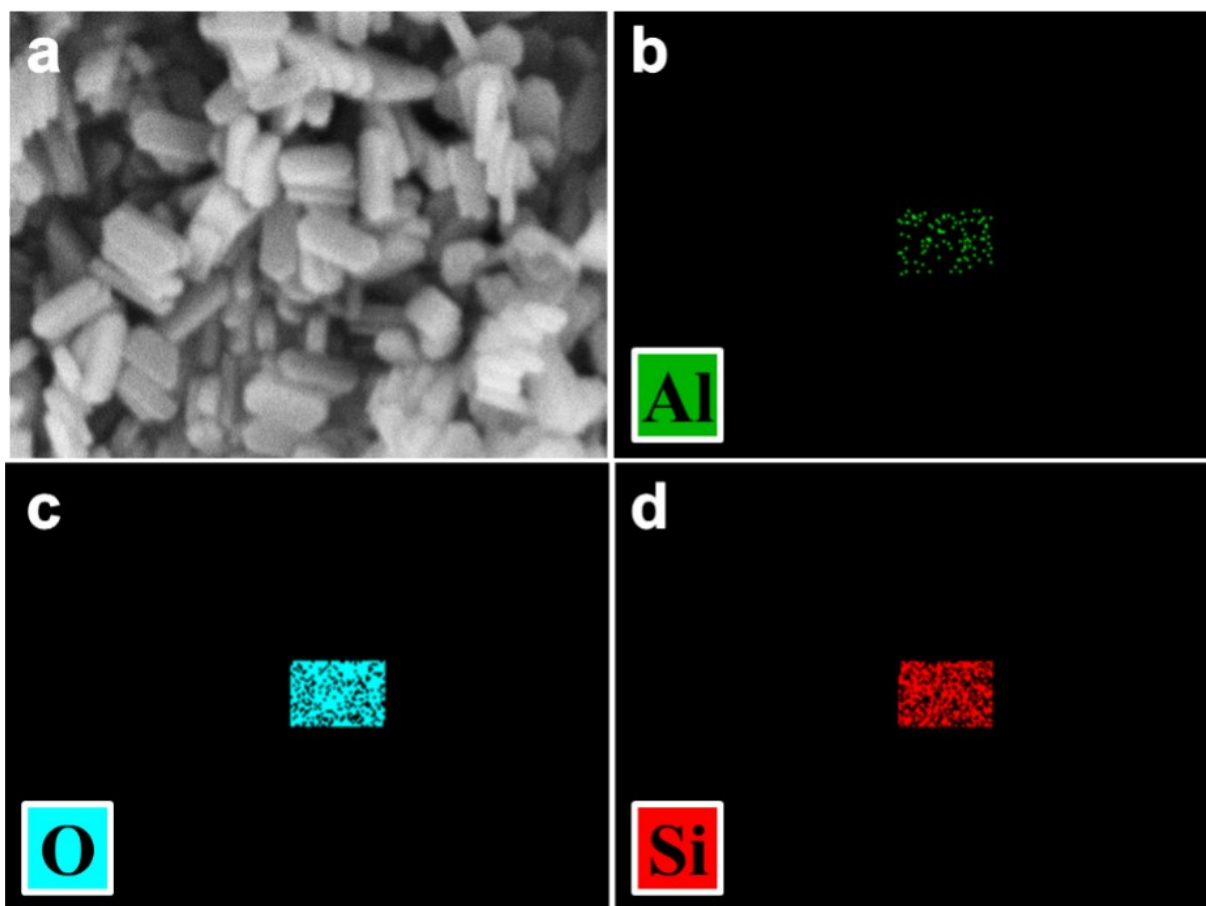

**Fig. S9** SEM (a) and EDX elemental maps of Al (b), O (c), and Si (d) of Sb<sub>x</sub>-HZ5-U2.

**Table S1.** Catalytic performance of syngas conversion over CMA and CMA/HZSM-5 bifunctional catalysts under the standard reaction conditions.

| Catalysts      | CO<br>Conv.<br>(%) | CO <sub>2</sub><br>Sel.<br>(%) | Product Selectivity (%) |                               |                               |                              |                              |      | Aro.<br>Yield<br>(%) |
|----------------|--------------------|--------------------------------|-------------------------|-------------------------------|-------------------------------|------------------------------|------------------------------|------|----------------------|
|                |                    |                                | CH <sub>4</sub>         | C <sub>2-4</sub> <sup>o</sup> | C <sub>2-4</sub> <sup>=</sup> | C <sub>5+</sub> <sup>o</sup> | C <sub>5+</sub> <sup>=</sup> | Aro. |                      |
| CMA            | 38.4               | 44.7                           | 2.7                     | 2.9                           | 38.5                          | 17.3                         | 38.6                         | 0    | 0                    |
| CMA/C-HZ5      | 33.5               | 38.1                           | 2.1                     | 1.8                           | 7.9                           | 29.1                         | 24.5                         | 34.6 | 7.2                  |
| CMA/H-HZ5      | 46.1               | 40.4                           | 2.2                     | 1.6                           | 7.9                           | 22.2                         | 14.8                         | 51.3 | 14.1                 |
| CMA/Hol-HZ5    | 54.5               | 44.3                           | 2.7                     | 2.1                           | 6.1                           | 13.8                         | 24.9                         | 50.3 | 15.3                 |
| CMA/Sbx-HZ5    | 57.9               | 53.8                           | 3.3                     | 2.3                           | 3.4                           | 21.5                         | 22.0                         | 47.5 | 12.7                 |
| CMA/Sbx-HZ5-U1 | 57.8               | 49.3                           | 2.6                     | 1.6                           | 5.9                           | 25.9                         | 18.2                         | 45.7 | 13.4                 |
| CMA/Sbx-HZ5-U2 | 70.4               | 41.3                           | 3.5                     | 2.3                           | 6.0                           | 8.1                          | 14.5                         | 65.6 | 27.1                 |
| CMA/Sbx-HZ5-U3 | 26.7               | 47.9                           | 2.6                     | 4.6                           | 0.3                           | 11.1                         | 22.3                         | 59.1 | 8.2                  |

Reaction condition: 280 °C, 2.0 MPa, 2000 mL·g<sup>-1</sup>·h<sup>-1</sup>, and H<sub>2</sub>/CO = 1.

**Table S2.** The aromatics distribution over CMA and CMA/HZSM-5 bifunctional catalysts under the standard reaction conditions.

| Catalysts      | Selectivity in aromatics (%) |      |      |                |                 |                  |
|----------------|------------------------------|------|------|----------------|-----------------|------------------|
|                | B                            | T    | E+X  | C <sub>9</sub> | C <sub>10</sub> | C <sub>11+</sub> |
| CMA            | /                            | /    | /    | /              | /               | /                |
| CMA/C-HZ5      | 6.5                          | 8.9  | 25.0 | 14.1           | 18.3            | 27.3             |
| CMA/H-HZ5      | 0.3                          | 6.7  | 29.3 | 28.5           | 22.7            | 12.6             |
| CMA/Ho1-HZ5    | 6.0                          | 10.8 | 21.0 | 23.8           | 16.2            | 22.2             |
| CMA/Sbx-HZ5    | 2.6                          | 2.5  | 18.9 | 20.1           | 32.8            | 23.1             |
| CMA/Sbx-HZ5-U1 | 2.3                          | 2.9  | 27.3 | 24.3           | 32.9            | 10.4             |
| CMA/Sbx-HZ5-U2 | 0.3                          | 3.4  | 24.1 | 28.5           | 20.0            | 23.7             |
| CMA/Sbx-HZ5-U3 | 2.3                          | 8.0  | 31.5 | 24.7           | 20.1            | 13.4             |

Reaction condition: 280 °C, 2.0 MPa, 2000 mL·g<sup>-1</sup>·h<sup>-1</sup>, and H<sub>2</sub>/CO = 1.

**Table S3.** Comparison of reported work on syngas conversion to aromatics.

| Catalysts                                         | T<br>(°C) | P<br>(MPa) | GHSV<br>(mL·g <sup>-1</sup> ·h <sup>-1</sup> ) | CO<br>Conv.<br>(%) | CO <sub>2</sub><br>Sel. (%) | CH <sub>4</sub><br>Sel. (%) | Aro.<br>Sel.<br>(%) | Ref.         |
|---------------------------------------------------|-----------|------------|------------------------------------------------|--------------------|-----------------------------|-----------------------------|---------------------|--------------|
| CMA/Sbx-HZ5-U2                                    | 280       | 2.0        | 2000                                           | 70.4               | 41.3                        | 3.5                         | 65.6                | This<br>work |
| CMA/Hol-Z5-N@2S1                                  | 280       | 2.0        | 1000                                           | 70.7               | 41.8                        | 2.9                         | 63.5                | 1            |
| FeMn+HZSM-5                                       | 320       | 1.0        | 3600                                           | 43.0               | 33.2                        | 21.8                        | 31.5                | 2            |
| FeMn@MZ5                                          | 320       | 2.0        | 3000                                           | 51.9               | 36.6                        | ~20.0                       | 47.1                | 3            |
| ZnCr <sub>2</sub> O <sub>4</sub> -400&H-<br>ZSM-5 | 390       | 3.0        | 1500                                           | 32.6               | 46.9                        | 2.1                         | 76.0                | 4            |
| MnCr-Z5                                           | 430       | 4.0        | 2250                                           | 12.2               | 47.3                        | 6.9                         | 64.7                | 5            |
| ZnCrO <sub>x</sub> +HZSM-5                        | 350       | 4.0        | 1500                                           | 16.0               | 46.9                        | 1.7                         | 73.9                | 6            |
| Zn-ZrO <sub>2</sub> +HZSM-5                       | 400       | 3.0        | 500                                            | 21.0               | 42.0                        | 2.2                         | 81.0                | 7            |
| Cr <sub>2</sub> O <sub>3</sub> /HZSM-5            | 395       | 4.0        | 2000                                           | 14.4               | 43.2                        | 2.8                         | 84.7                | 8            |
| Fe/ZnCr <sub>2</sub> O <sub>4</sub> +HZSM-5       | 380       | 4.0        | 1500                                           | 57.5               | ~47                         | ~3                          | 74                  | 9            |
| Mo-ZrO <sub>2</sub> +HZSM-5                       | 400       | 3.0        | 3000                                           | 22.0               | 41.0                        | 3.4                         | 76.0                | 10           |

## References

1. H. Wang, P. Gao, S. Li, T. Wang, C. Yang, J. Li, T. Lin, L. Zhong and Y. Sun, Bifunctional catalysts with versatile zeolites enable unprecedented para-xylene productivity for syngas conversion under mild conditions, *Chem Catal.*, 2022, **2**, 779–796.
2. T. Wang, Y. B. Xu, C. M. Shi, F. Jiang, B. Liu and X. H. Liu, Direct production of aromatics from syngas over a hybrid FeMn Fischer-Tropsch catalyst and HZSM-5 zeolite: Local environment effect and mechanism-directed tuning of the aromatic selectivity, *Catal. Sci. Technol.*, 2019, **9**, 3933–3946.
3. Y. Xu, G. Ma, J. Bai, Y. Du, C. Qin and M. Ding, Yolk@shell FeMn@hollow HZSM-5 nanoreactor for directly converting syngas to aromatics, *ACS Catal.*, 2021, **11**, 4476–4485.
4. Y. Fu, Y. Ni, W. Cui, X. Fang, Z. Chen, Z. Liu, W. Zhu and Z. Liu, Insights into the size effect of  $\text{ZnCr}_2\text{O}_4$  spinel oxide in composite catalysts for conversion of syngas to aromatics, *Green Energy Environ.*, 2023, **8**, 530–537.
5. D. Y. Miao, Y. Ding, T. Yu, J. Li, X. L. Pan and X. H. Bao, Selective synthesis of benzene, toluene, and xylenes from syngas, *ACS Catal.*, 2020, **10**, 7389–7397.
6. J. H. Yang, X. L. Pan, F. Jiao, J. Li and X. H. Bao, Direct conversion of syngas to aromatics, *Chem. Commun.*, 2017, **53**, 11146–11149.
7. K. Cheng, W. Zhou, J. C. Kang, S. He, S. L. Shi, Q. H. Zhang, Y. Pan, W. Wen and Y. Wang, Bifunctional catalysts for one-step conversion of syngas into aromatics with excellent selectivity and stability, *Chem*, 2017, **3**, 334–347.
8. C. Liu, J. J. Su, S. Liu, H. B. Zhou, X. H. Yuan, Y. C. Ye, Y. Wang, W. Q. Jiao, L. Zhang, Y. Q. Lu, Y. D. Wang, H. Y. He and Z. K. Xie, Insights into the key factor of zeolite morphology on



the selective conversion of syngas to light aromatics over a Cr<sub>2</sub>O<sub>3</sub>/ZSM-5 catalyst, *ACS Catal.*, 2020, **10**, 15227–15237.

9. Y. Fu, Y. M. Ni, Z. Y. Chen, W. L. Zhu and Z. M. Liu, Achieving high conversion of syngas to aromatics, *J. Energy Chem.*, 2022, **66**, 597–602.

10. W. Zhou, S. Shi, Y. Wang, L. Zhang, Y. Wang, G. Zhang, X. Min, K. Cheng, Q. Zhang, J. Kang and Y. Wang, Selective conversion of syngas to aromatics over a Mo–ZrO<sub>2</sub>/H-ZSM-5 bifunctional catalyst, *ChemCatChem*, 2019, **11**, 1681–1688.
